# Supplementary material for: 2C-ChIP: measuring chromatin immunoprecipitation signal from defined genomic regions with deep sequencing
Source: PubMed Central journal article supplement (PMC6394006; doi:10.1186/s12864-019-5532-5), 2019-02-28

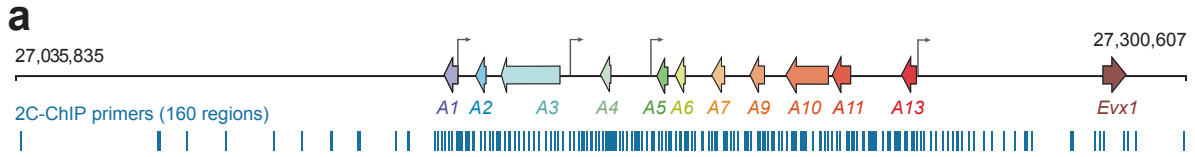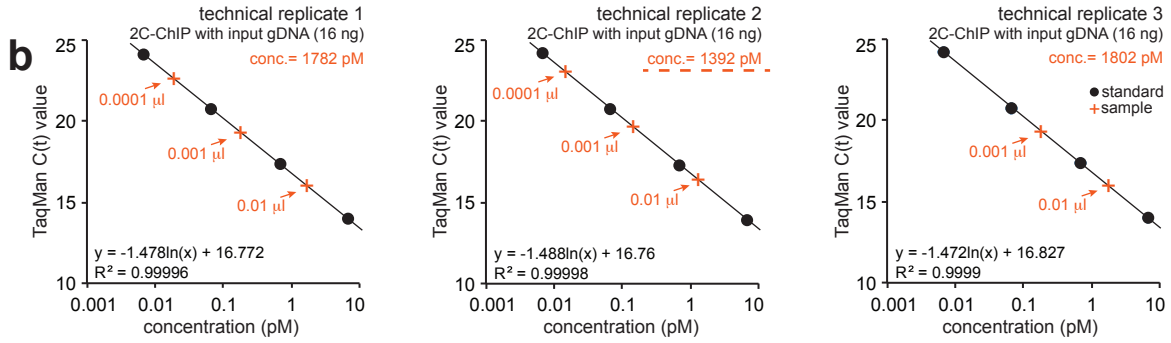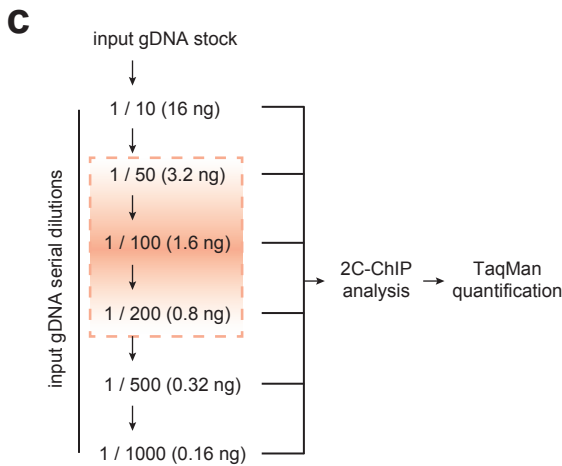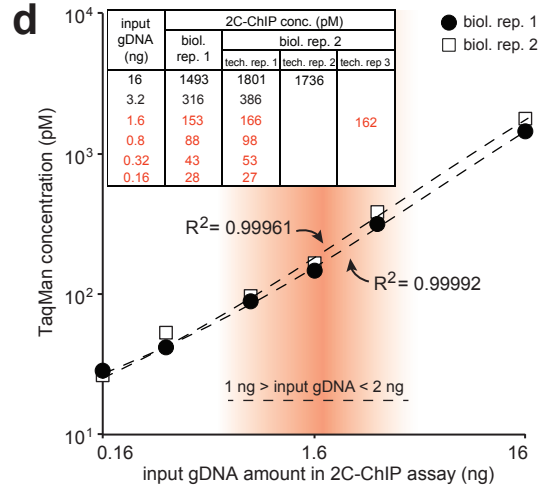

**e**

| input gDNA (ng) | biological replicate 1 |                           | biological replicate 2 |                           |
|-----------------|------------------------|---------------------------|------------------------|---------------------------|
|                 | total reads            | mapped expected pairs (%) | total reads            | mapped expected pairs (%) |
| 16              | 215580                 | 215066 (99.8)             | 198904                 | 198483 (99.8)             |
| 3.2             | 219995                 | 218626 (99.4)             | 202718                 | 201626 (99.5)             |
| 1.6             | 195821                 | 193487 (98.8)             | 214259                 | 211927 (98.9)             |
| 0.8             | 181567                 | 177577 (97.8)             | 194216                 | 190405 (98)               |
| 0.32            | 162839                 | 154670 (95)               | 141043                 | 134577 (95.4)             |
| 0.16            | 121086                 | 109511 (90.4)             | 149221                 | 138063 (92.5)             |

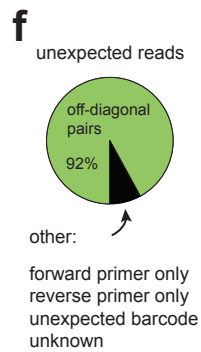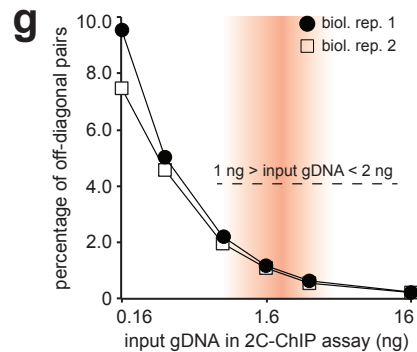

Supplement: 12864_2019_5532_MOESM8_ESM.pdf [file 12864_2019_5532_MOESM8_ESM.pdf]
