# Supplementary material for: 2C-ChIP: measuring chromatin immunoprecipitation signal from defined genomic regions with deep sequencing
Source: PubMed Central journal article supplement (PMC6394006; doi:10.1186/s12864-019-5532-5), 2019-02-28

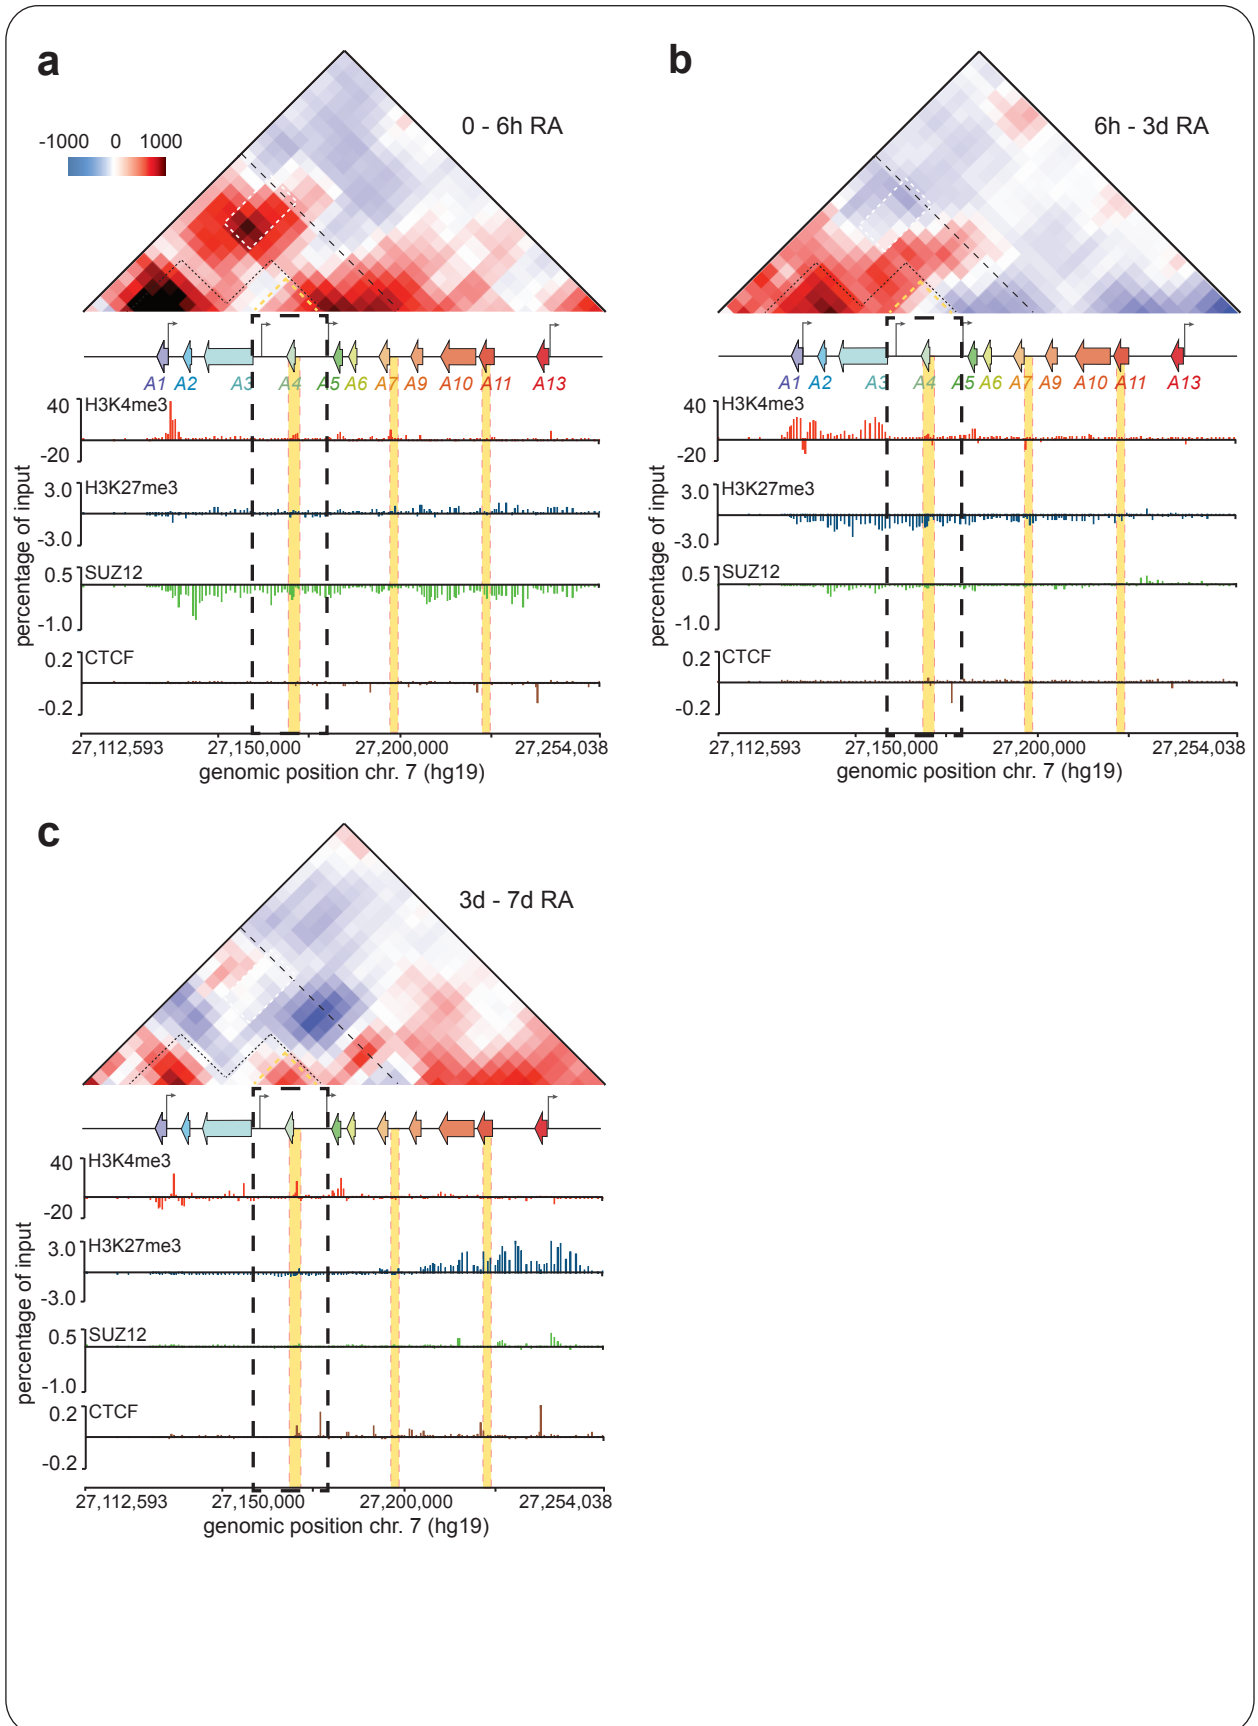

Supplement: 12864_2019_5532_MOESM15_ESM.pdf [file 12864_2019_5532_MOESM15_ESM.pdf]
